# Supplementary material for: A hydrodynamic model for Galveston Bay and the shelf in the northern Gulf of Mexico
Source: Copernicus journal article supplement (doi:10.5194/os-15-951-2019), 2019-07-17
Supplement: Supplementary file 1 [file os-15-951-2019-supplement.pdf]

Supplement of Ocean Sci., 15, 951–966, 2019  
<https://doi.org/10.5194/os-15-951-2019-supplement>  
© Author(s) 2019. This work is distributed under  
the Creative Commons Attribution 4.0 License.

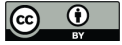

*Supplement of*

## **A hydrodynamic model for Galveston Bay and the shelf in the northern Gulf of Mexico**

**Jiabi Du et al.**

*Correspondence to:* Jiabi Du ([jdu@tamug.edu](mailto:jdu@tamug.edu))

The copyright of individual parts of the supplement might differ from the CC BY 4.0 License.

## Supplemental Figures

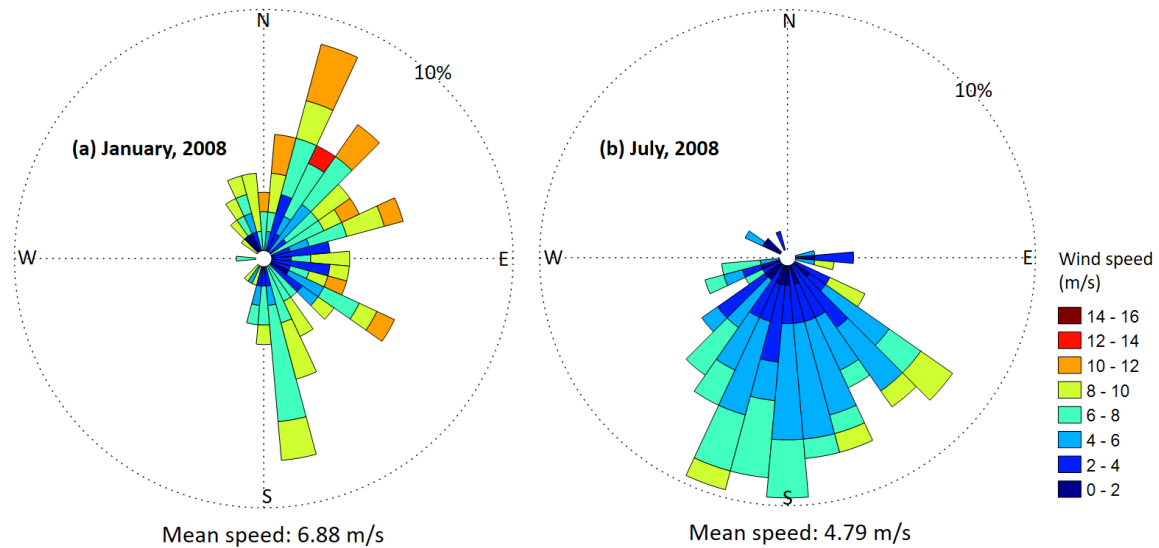

Figure S1: Wind rose plots for January and July of 2008 at the mouth of Galveston Bay. The monthly mean wind speed is shown at the bottom of each plot.

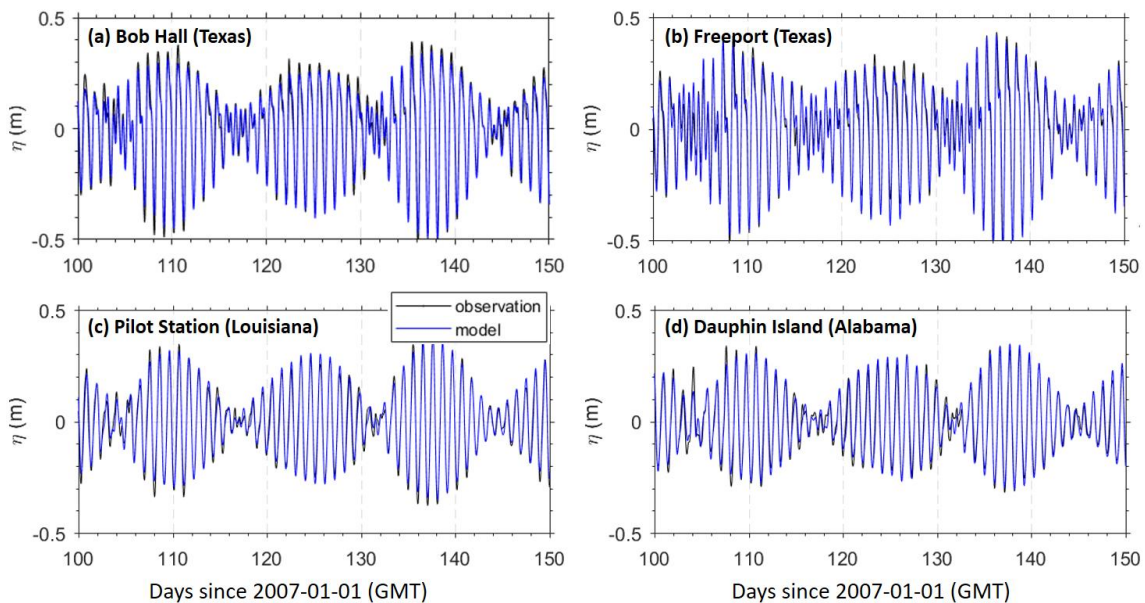

Figure S2: Harmonic water level comparison between model and observation at four selected stations Bob Hall (Texas), Freeport (Texas), Pilot Station (Louisiana), and Dauphin Island (Alabama) (see Fig.2 for their locations).

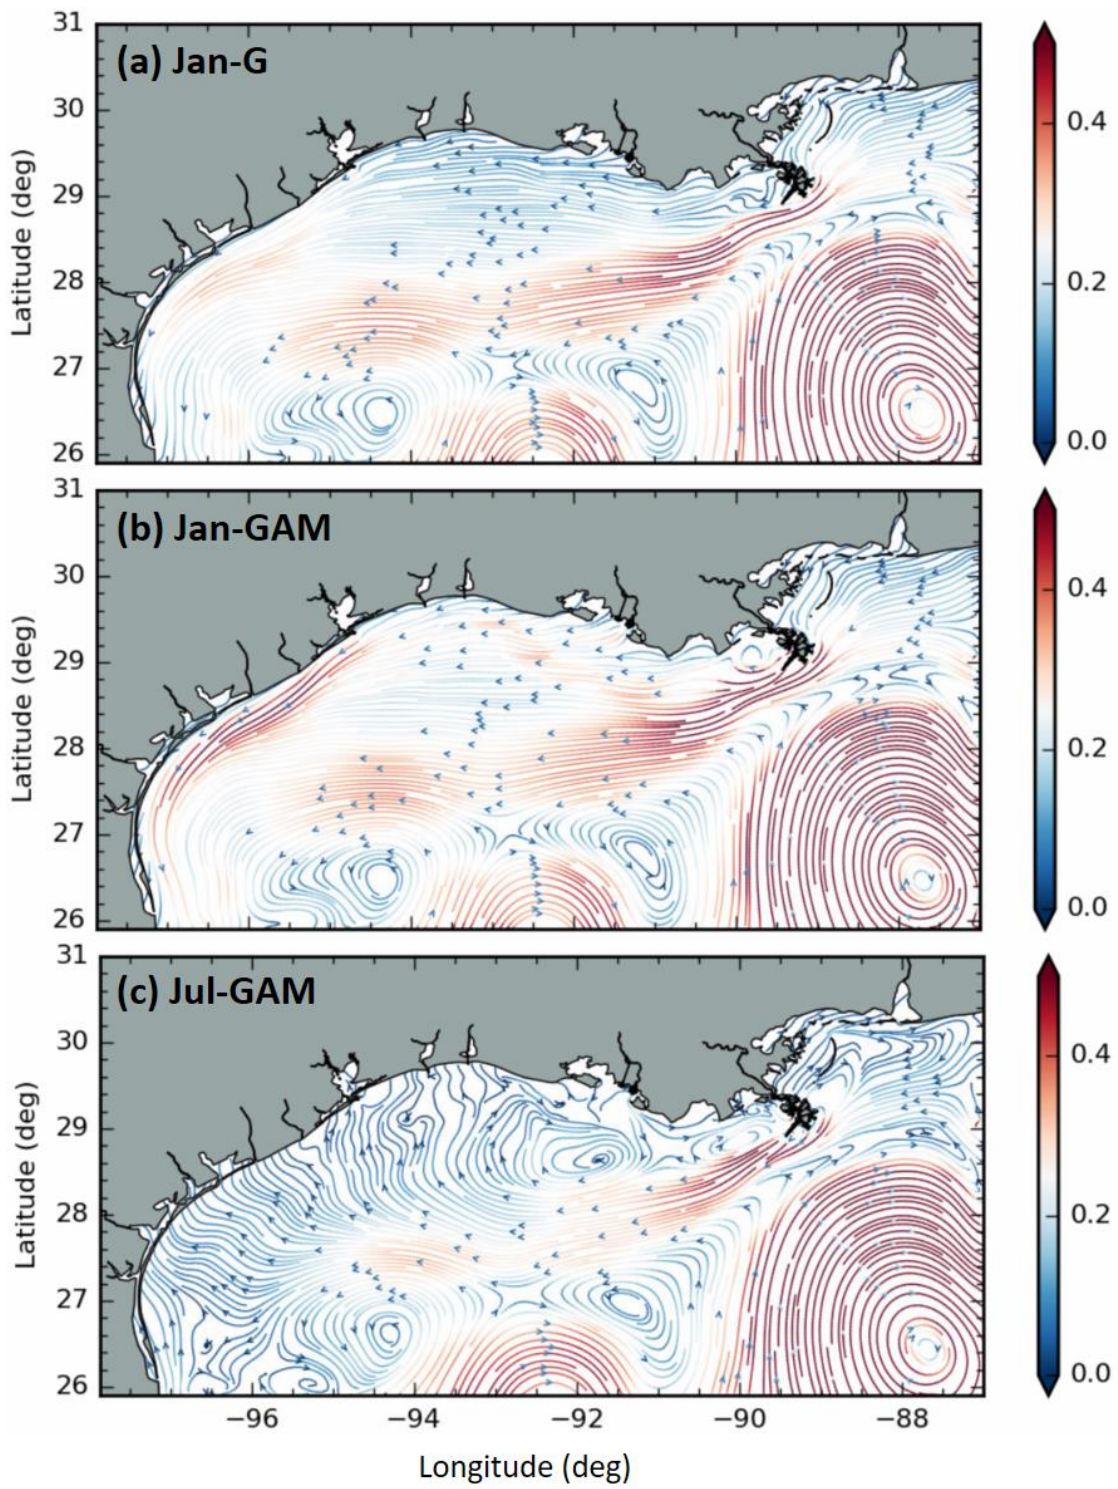

Figure S3: Surface residual current averaged over days 250-300 for three numerical experiments, with the color of the streamlines indicating the current speed.
